# Supplementary material for: Boosted charge transfer and CO2 photoreduction by construction of S-scheme heterojunctions between Cs2AgBiBr6 nanosheets and two-dimensional metal–organic frameworks
Source: Royal Society of Chemistry journal article supplement (doi:10.1039/d2tc04284c), 2023-01-01
Supplement: d2tc04284c1.pdf [file d2tc04284c1.pdf]

## Supporting Information

### Boosted charge transfer and CO<sub>2</sub> photoreduction by construction of S-scheme heterojunction between Cs<sub>2</sub>AgBiBr<sub>6</sub> nanosheets and two-dimensional metal-organic frameworks

Ying Jiang, Rui Zhou, Zhijie Zhang\*, Zhongliang Dong, Jiayue Xu\*

School of Materials Science and Engineering, Shanghai Institute of Technology, 100

Haiquan Road, Shanghai, 201418, P. R. China

\*Corresponding author. *Email address:* [zjzhang@sit.edu.cn](mailto:zjzhang@sit.edu.cn) (Z. J. Zhang);

[xujiayue@sit.edu.cn](mailto:xujiayue@sit.edu.cn) (J. Y. Xu)

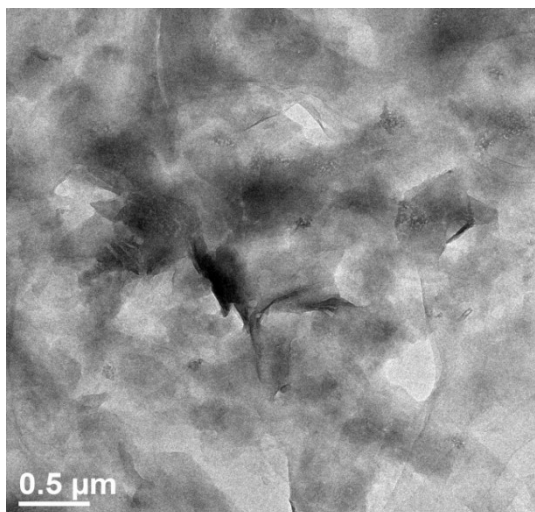

**Figure S1** TEM image of the as-prepared Ni-MOF NSs.

**Figure S2** High-angle annular dark-field (HAADF) image and EDX elemental mappings of C, O, and Ni elements in Ni-MOF.

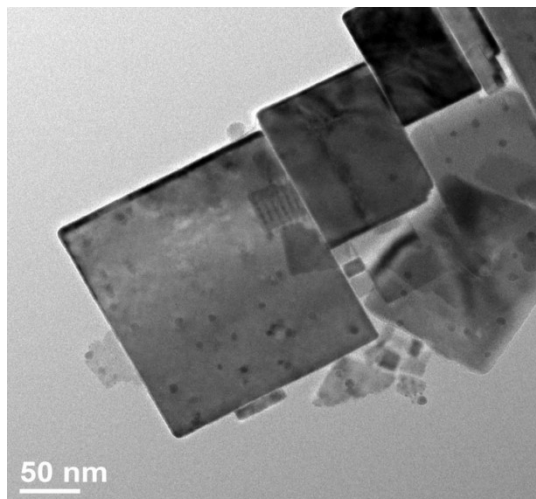

**Figure S3** TEM image of the as-prepared CABB NSs.

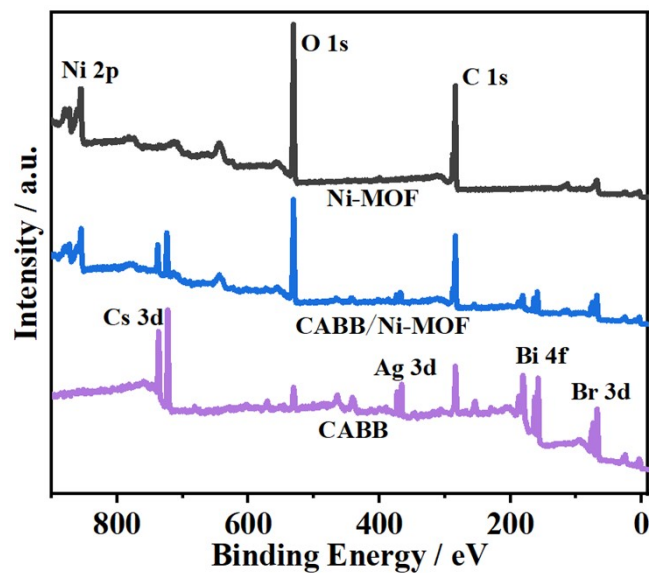

**Figure S4** XPS survey spectra of CABB NSs, Ni-MOF NSs, and the CABB/Ni-MOF hybrid.

**Figure S5** Time courses of (a) CO and (b) CH<sub>4</sub> evolution by CABB NSs, Ni-MOF NSs, and the CABB/Ni-MOF hybrids.

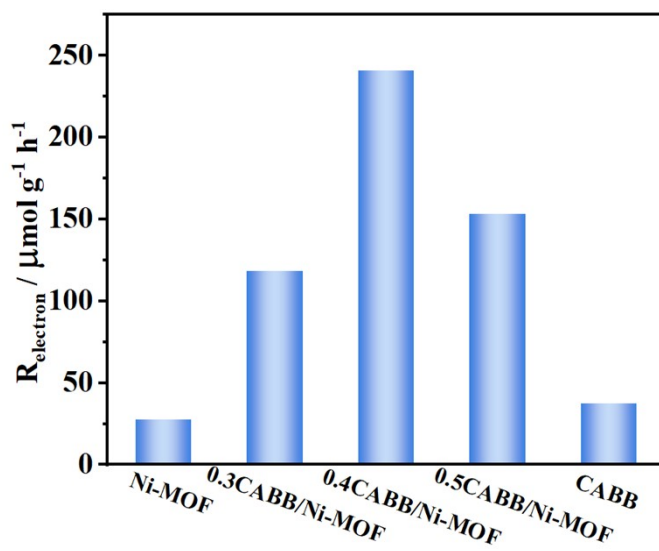

**Figure S6** Comparison of  $R_{\text{electron}}$  values of CABB NSs, Ni-MOF NSs, and the CABB/Ni-MOF hybrids.

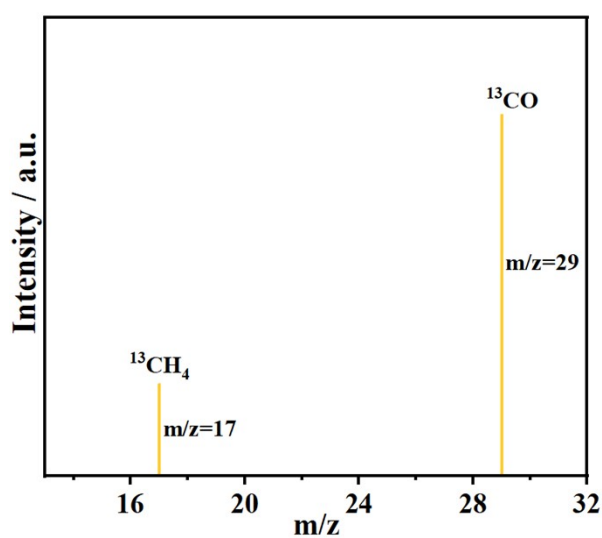

**Figure S7** Mass spectra showing  $^{13}\text{CO}$  and  $^{13}\text{CH}_4$  produced over CABB/Ni-MOF hybrid in the photocatalytic reduction of  $^{13}\text{CO}_2$ .

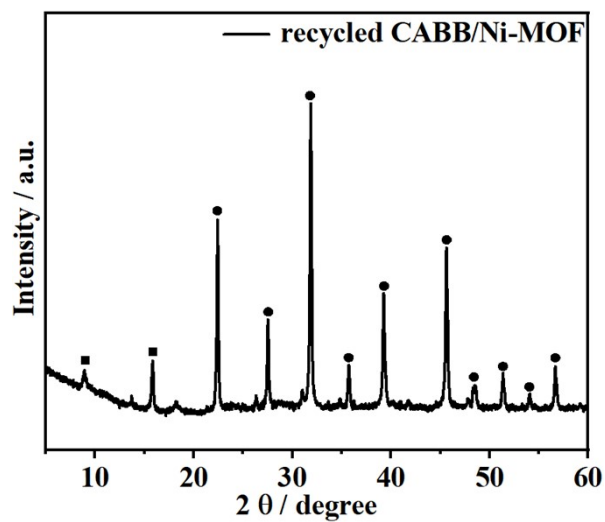

**Figure S8** XRD pattern of the recycled CABB/Ni-MOF hybrid.

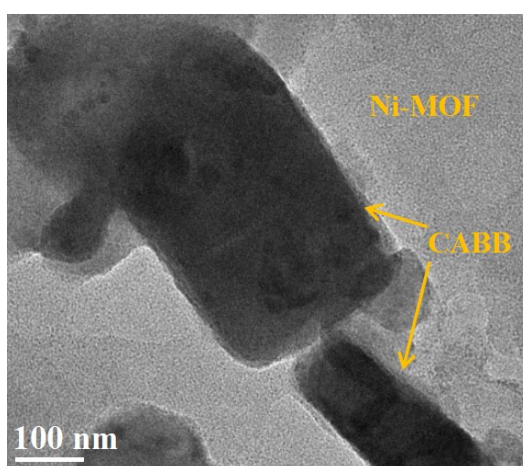

**Figure S9** TEM image of the recycled CABB/Ni-MOF hybrid.

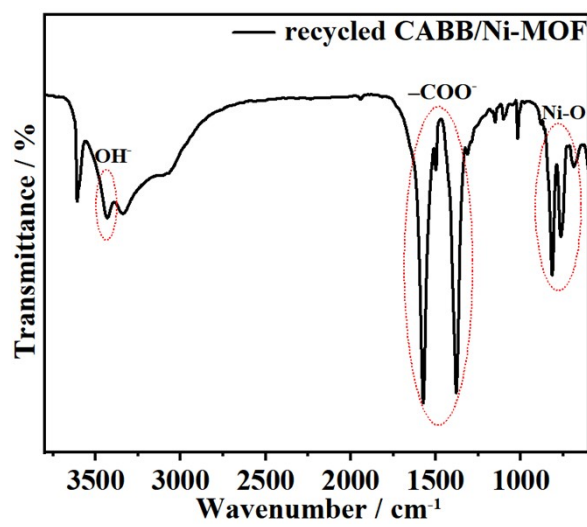

**Figure S10** FTIR spectrum of the recycled CABB/Ni-MOF hybrid.

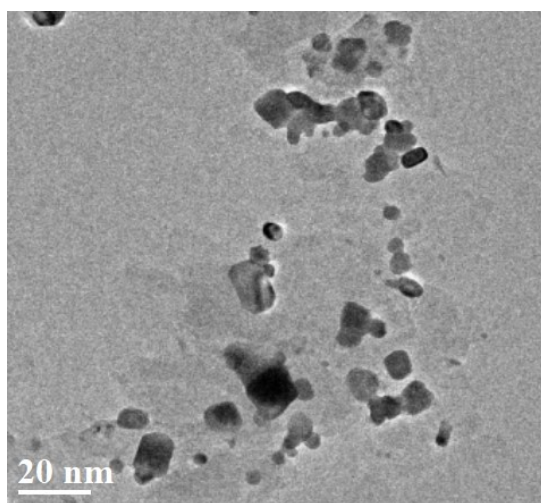

**Figure S11** TEM image of the 0D/2D CABB/Ni-MOF hybrid.

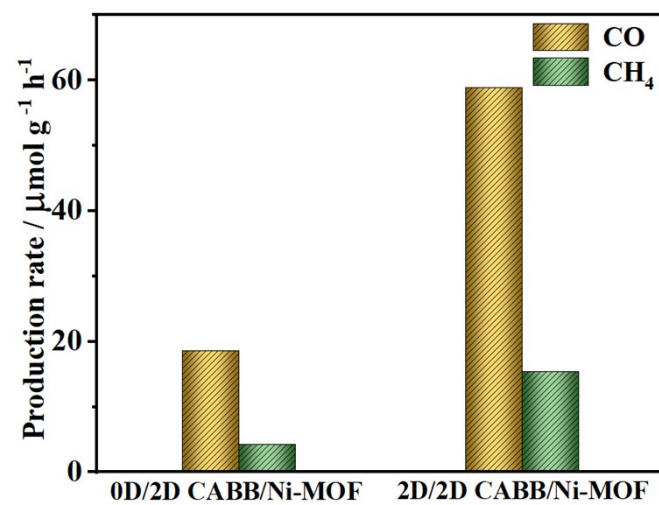

**Figure S12** Comparison of photocatalytic CO<sub>2</sub> reduction activities of the 0D/2D and 2D/2D CABB/Ni-MOF hybrids.

Table S1 A comparison of the photocatalytic CO<sub>2</sub> reduction performances by various perovskite-based photocatalysts.

| Photocatalyst                                              | Light source       | Products                             | R <sub>electron</sub> (μmol g <sup>-1</sup> h <sup>-1</sup> ) | Ref.      |
|------------------------------------------------------------|--------------------|--------------------------------------|---------------------------------------------------------------|-----------|
| CABB/Ni-MOF                                                | 300 W Xe lamp      | CO, CH <sub>4</sub>                  | 241.14                                                        | this work |
| Cs <sub>2</sub> AgBiBr <sub>6</sub> NCs                    | 100 W Xe lamp      | CO, CH <sub>4</sub>                  | 16.2                                                          | 1         |
| Cs <sub>2</sub> AgBiBr <sub>6</sub> NPLs                   | 405 nm laser diode | CO, CH <sub>4</sub>                  | 42.6                                                          | 2         |
| Cs <sub>2</sub> AgBiBr <sub>6</sub> - Cu - RGO             | 300 W Xe lamp      | CO, CH <sub>4</sub> , H <sub>2</sub> | 93                                                            | 3         |
| Cs <sub>2</sub> AgBiBr <sub>6</sub> /CTF-1                 | 300 W Xe lamp      | CO, CH <sub>4</sub>                  | 130.2                                                         | 4         |
| Cs <sub>2</sub> AgBiBr <sub>6</sub> @M-Ti                  | 300 W Xe lamp      | CO, CH <sub>4</sub>                  | 271.6                                                         | 5         |
| CsPbBr <sub>3</sub> QDs/GO                                 | 100 W Xe lamp      | CO, H <sub>2</sub> , CH <sub>4</sub> | 29.8                                                          | 6         |
| CsPbBr <sub>3</sub> QDs/g-C <sub>3</sub> N <sub>4</sub>    | 300 W Xe lamp      | CO                                   | 149                                                           | 7         |
| P3HT/CsPbBr <sub>3</sub>                                   | 300 W Xe lamp      | CO, CH <sub>4</sub>                  | 475.3                                                         | 8         |
| C <sub>60</sub> /CsPbBr <sub>3</sub>                       | 300 W Xe lamp      | CO, CH <sub>4</sub>                  | 90.2                                                          | 9         |
| CsPbBr <sub>3</sub> /MWCNT                                 | 300 W Xe lamp      | CO, CH <sub>4</sub>                  | 116.2                                                         | 10        |
| CsPbBr <sub>3</sub> NCs/UiO-66(NH <sub>2</sub> )           | 300 W Xe lamp      | CO, CH <sub>4</sub>                  | 18.5                                                          | 11        |
| CsPbBr <sub>3</sub> QDs/Bi <sub>2</sub> WO <sub>6</sub> NS | 300 W Xe lamp      | CO, CH <sub>4</sub>                  | 114.4                                                         | 12        |
| CsPbBr <sub>3</sub> NCs/BP NS                              | 200 W Xe lamp      | CO, CH <sub>4</sub>                  | 175.0                                                         | 13        |
| CsPbBr <sub>3</sub> /CTF-1                                 | 300 W Xe lamp      | CO                                   | 48.2                                                          | 14        |
| CsPbBr <sub>3</sub> NCs/MXene                              | 300 W Xe lamp      | CO, CH <sub>4</sub>                  | 110.6                                                         | 15        |
| CsPbBr <sub>3</sub> NCs@a-TiO <sub>2</sub>                 | 150 W Xe lamp      | H <sub>2</sub> , CO, CH <sub>4</sub> | 64.5                                                          | 16        |
| CsPbBr <sub>3</sub> NCs@ZIF-67                             | 100 W Xe lamp      | CO, CH <sub>4</sub>                  | 29.6                                                          | 17        |
| CsPbBr <sub>3</sub> -Re(CO) <sub>3</sub> Br(dcbpy)         | 150 W Xe lamp      | H <sub>2</sub> , CO                  | 73.34                                                         | 18        |
| CsPbBr <sub>3</sub> NCs/ZnO/RGO                            | 150 W Xe lamp      | CO, CH <sub>4</sub>                  | 52.0                                                          | 19        |
| α-Fe <sub>2</sub> O <sub>3</sub> /RGO/CsPbBr <sub>3</sub>  | 150 W Xe lamp      | H <sub>2</sub> , CO, CH <sub>4</sub> | 81.0                                                          | 20        |
| 2D/2D CsPbBr <sub>3</sub> /Bi <sub>2</sub> WO <sub>6</sub> | 150 W Xe lamp      | H <sub>2</sub> , CO, CH <sub>4</sub> | 137.1                                                         | 21        |
| CsPbBr <sub>3</sub> NCs/MoS <sub>2</sub> NS                | 300 W Xe lamp      | CO, CH <sub>4</sub>                  | 152.4                                                         | 22        |
| CsPbBr <sub>3</sub> NCs/Pd NS                              | 150 W Xe lamp      | H <sub>2</sub> , CO, CH <sub>4</sub> | 33.8                                                          | 23        |
| CsPbBr <sub>3</sub> -Au                                    | 100 W Xe lamp      | CO, CH <sub>4</sub>                  | 47.7                                                          | 24        |
| CsPbBr <sub>3</sub> -Ni(tpy)                               | 300 W Xe lamp      | CO, CH <sub>4</sub>                  | 1252                                                          | 25        |

## References

1. L. Zhou, Y. Xu, B. Chen, D. Kuang, C. Su, *Small*, 2018, **14**, 1703762.
2. Z. Liu, H. Yang, J. Wang, Y. Yuan, K. Hills-Kimball, T. Cai, P. Wang, A. Tang, O. Chen, *Nano Lett.*, 2021, **21**, 1620-1627.
3. S. Kumar, I. Hassan, M. Regue, S. Gonzalez-Carrero, E. Rattner, Mark. A. Isaacs, S. Eslava, *J. Mater. Chem. A*, 2021, **9**, 12179.



4. Z. Zhang, Y. Jiang, Z. Dong, Y. Chu, J. Xu, *Inorg. Chem.*, 2022, **61**, 16028-16037.
5. Q. Sun, J. Xu, F. Tao, W. Ye, C. Zhou, J. He, J. Lu, *Angew. Chem. Int. Ed.*, 2022, **61**, 202200872.
6. Y. Xu, M. Yang, B. Chen, X. Wang, H. Chen, D. Kuang, C. Su, *J. Am. Chem. Soc.*, 2017, **139**, 5660-5663.
7. M. Ou, W. Tu, S. Yin, W. Xing, S. Wu, H. Wang, S. Wan, Q. Zhong, R. Xu, *Angew. Chem. Int. Ed.*, 2018, **57**, 13570-13574.
8. L. Li, Z. Zhang, C. Ding, J. Xu, *Chem. Eng. J.*, 2021, **419**, 129543.
9. Z. Zhang, M. Shu, Y. Jiang, J. Xu, *Chem. Eng. J.*, 2021, **414**, 128889.
10. M. Shu, Z. Zhang, Z. Dong, J. Xu, *Carbon*, 2021, **182**, 454-462.
11. S. Wan, M. Ou, Q. Zhong, X. Wang, *Chem. Eng. J.*, 2019, **358**, 1287-1295.
12. J. Wang, J. Wang, N. Li, X. Du, J. Ma, C. He, Z. Li, *ACS. Appl. Mater. Interfaces*, 2020, **12**, 31477-31485.
13. X. Wang, J. He, J. Li, G. Lu, F. Dong, T. Majima, M. Zhu, *Appl. Catal. B: Environ.*, 2020, **277**, 119230.
14. Q. Wang, J. Wang, J. Wang, X. Hu, Y. Bai, X. Zhong, Z. Li, *ChemSusChem*, 2021, **14**, 1-10.
15. A. Pan, X. Ma, S. Huang, Y. Wu, M. Jia, Y. Shi, Y. Liu, P. Wangyang, L. He, Y. Liu, *J. Phys. Chem. Lett.*, 2019, **10**, 6590-6597.
16. Y. Xu, X. Wang, J. Liao, B. Chen, H. Chen, D. Kuang, *Adv. Mater. Interfaces*, 2018, 1801015.
17. Z. Kong, J. Liao, Y. Dong, Y. Xu, H. Chen, D. Kuang, C. Su, *ACS Energy Lett.*, 2018, **3**, 2656-2662.
18. Z. C. Kong, H. H. Zhang, J. F. Liao, Y. J. Dong, Y. Jiang, H. Y. Chen, D. B. Kuang, *Sol. RRL*, 2019, **4**, 1900365.
19. Y. Jiang, J. F. Liao, Y. F. Xu, H. Y. Chen, X. D. Wang, D. B. Kuang, *J. Mater. Chem. A*, 2019, **7**, 13762-13769.
20. Y. Jiang, J. F. Liao, H. Y. Chen, H. H. Zhang, J. Y. Li, X. D. Wang, D. B. Kuang, *Chem*, 2020, **6**, 766-780.
21. Y. Jiang, H. Chen, J. Li, J. Liao, H. Zhang, X. Wang, D. Kuang, *Adv. Funct. Mater.*, 2020, **30**, 2004293.
22. X. Wang, J. He, L. Mao, X. Cai, C. Sun, M. Zhu, *Chem. Eng. J.*, 2021, **416**, 128077.
23. Y. F. Xu, M. Z. Yang, H. Y. Chen, J. F. Liao, X. D. Wang, D. B. Kuang, *ACS Appl. Energy Mater.*, 2018, **1**, 5083-5089.
24. J. F. Liao, Y. T. Cai, J. Y. Li, Y. Jiang, X. D. Wang, H. Y. Chen, D. B. Kuang, *J. Energy Chem.*, 2021, **53**, 309-315.
25. Z. Chen, Y. Hu, J. Wang, Q. Shen, Y. Zhang, C. Ding, Y. Bai, G. Jiang, Z. Li, N. Gaponik, *Chem. Mater.*, 2020, **32**, 1517-1525.
